# Supplementary material for: Dynamics of nucleophilic substitution on ambident nucleophiles CN− and iodomethane: insights into the competition mechanism with neutral isomeric products
Source: Royal Society of Chemistry journal article supplement (doi:10.1039/d3cp00491k), 2023-01-01
Supplement: d3cp00491k9.pdf [file d3cp00491k9.pdf]

## Supporting Information

### **Dynamics of Nucleophilic Substitution on Ambident Nucleophile CN<sup>-</sup> and Iodomethane: Insights into the Competition Mechanism with Neutral Isomeric Products**

Xu Liu,<sup>a</sup> Shiqi Tian,<sup>a</sup> Boxue Pang,<sup>\*,b</sup> Hui Li,<sup>a</sup> Yang Wu,<sup>\*,a</sup>

<sup>a</sup>College of Chemistry, Liaoning University, Shenyang 110036, P. R. China

E-mail: liuxu@lnu.edu.cn, wuyang@lnu.edu.cn

<sup>b</sup>Key Laboratory of Ministry of Education on Safe Mining of Deep Metal Mines,  
School of Resources and Civil Engineering, Northeastern University, Shenyang,

110819, China

E-mail: pangboxue@126.com

Table S1. Electronic structure theory energies for stationary points of the S<sub>N</sub>2 pathways on the CN<sup>-</sup> + CH<sub>3</sub>I PES with different methods.<sup>a</sup>

| Species                               | Method |       |        |       |        |        |       |                               |
|---------------------------------------|--------|-------|--------|-------|--------|--------|-------|-------------------------------|
|                                       | MP2    | B3LYP | B97-1  | M06   | M06-2X | BP86   | MPW1K | CCSD(T)-F12b/PPQ <sup>b</sup> |
| XRC                                   | -10.4  | -9.9  | -11.9  | -13.1 | -11.1  | -13.6  | -9.9  | -10.2                         |
| XTS                                   | -0.3   | 0.9   | 0.1    | -0.8  | -0.2   | 0.8    | 0.88  |                               |
| RC1                                   | -10.2  | -9.3  | -10.0  | -9.91 | -12.0  | -10.12 | -9.6  | -9.7                          |
| RCTS                                  | -10.1  | -9.2  | -9.8   | -9.86 | -9.5   | -10.09 | -9.4  | -9.7                          |
| RC2                                   | -10.7  | -10.1 | -10.7  | -10.9 | -11.1  |        | -9.9  | -10.2                         |
| TS1                                   | -6.1   | -8.9  | -9.4   | -7.8  | -7.7   |        | -7.0  | -6.3                          |
| TS2                                   | 41.2   | 32.3  | 32.5   | 33.3  | 36.2   | 26.3   | 38.7  | 37.7                          |
| PC                                    | -60.5  | -60.9 | -61.1  | -61.2 | -63.2  | -61.0  | -65.9 | -60.6                         |
| XRC'                                  | -9.6   | -8.3  | -9.9   | -11.7 | -9.9   | -10.5  | -8.4  | -8.8                          |
| XTS'                                  | -0.5   | 0.9   | 0.1    | -0.7  | -0.3   | 0.9    | 0.87  |                               |
| RC1'                                  | -10.6  | -9.74 | -10.33 | -10.4 |        | -10.11 | -10.1 |                               |
| RCTS'                                 |        | -9.67 | -10.30 | -10.4 | -10.1  | -10.04 | -9.8  |                               |
| RC2'                                  | -11.0  | -10.0 | -10.6  | -11.2 | -11.4  | -10.7  | -10.1 |                               |
| TS1'                                  | -2.0   | -5.7  | -5.8   | -4.5  | -4.2   | -8.4   | -3.7  | -2.3                          |
| TS2'                                  | 45.9   | 36.0  | 36.6   | 36.9  | 40.6   | 30.6   | 43.0  | 42.6                          |
| PC'                                   | -35.1  | -38.2 | -38.9  | -38.5 | -42.0  | -37.3  | -42.6 | -36.6                         |
| P NCCH <sub>3</sub> + I <sup>-</sup>  | -48.1  | -50.6 | -49.8  | -49.5 | -51.1  | -50.4  | -55.1 | -48.8                         |
| P' CNCH <sub>3</sub> + I <sup>-</sup> | -21.4  | -27.8 | -27.4  | -27.1 | -29.5  | -26.6  | -31.8 | -24.2                         |

<sup>a</sup> Energies (in kcal/mol) are with respect to the CN<sup>-</sup> + CH<sub>3</sub>I reactants and do not include ZPE.

<sup>b</sup> The higher level CCSD(T)-F12b/PPQ energy comes from reference: Z. Kerekes, D. A. Tasi and G. Czako, J. Phys. Chem. A, 2022, 126, 889-900.

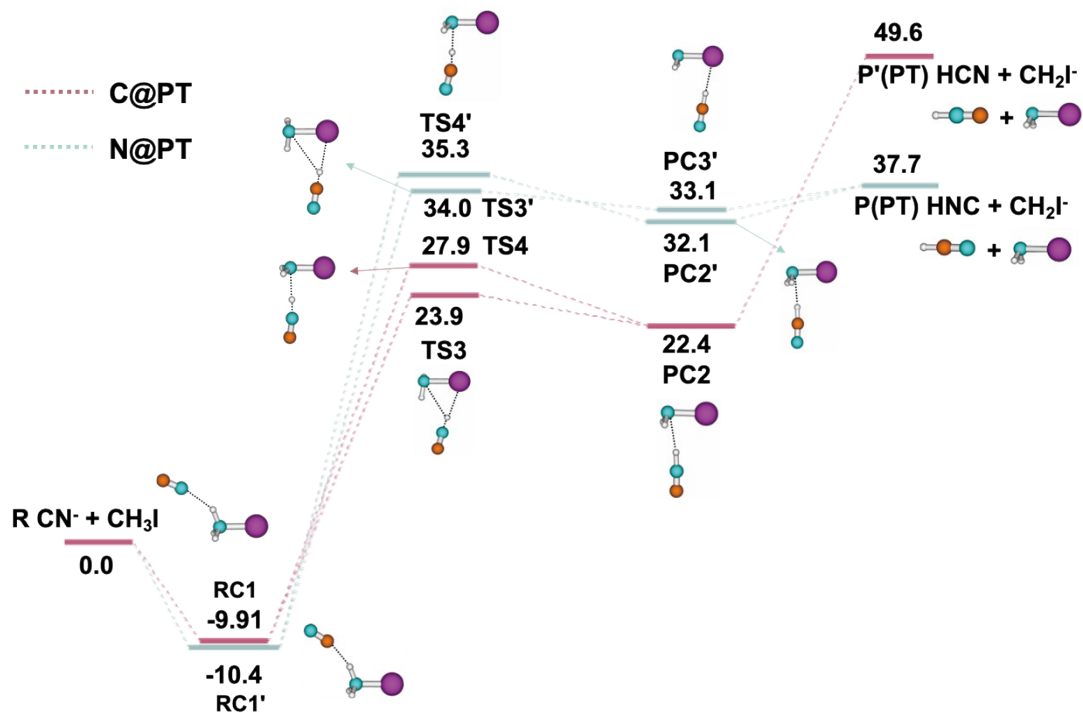

Figure S1. Potential energy profile and stationary points for proton transfer pathways in reaction  $\text{CN}^- + \text{CH}_3\text{I}$  at the M06/ECP/d level of theory. Energies in kcal/mol are relative to reactants without zero-point energy (ZPE).

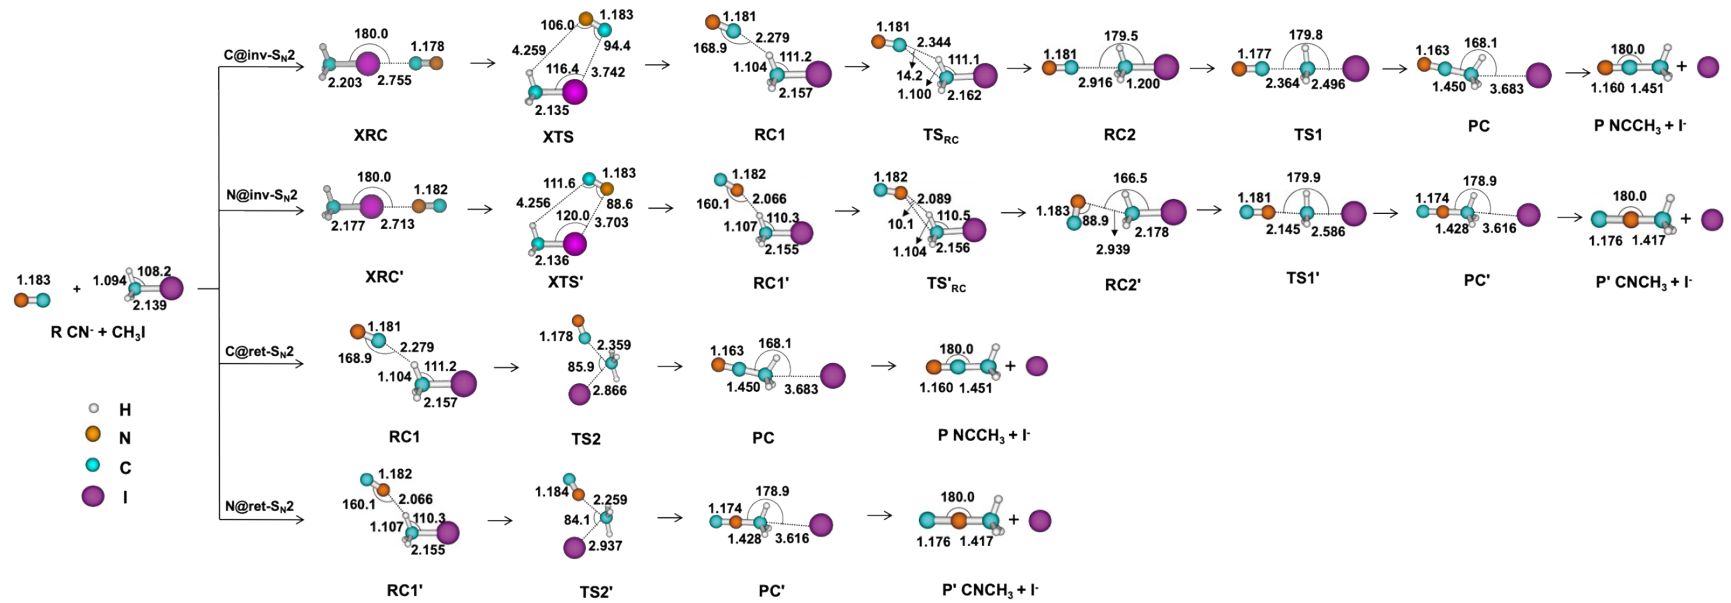

Figure S2. M06/ECP/d geometries of stationary points for S<sub>N</sub>2 pathways in the CN<sup>-</sup> + CH<sub>3</sub>I reaction. Bond distances are in Å and angles in degree.

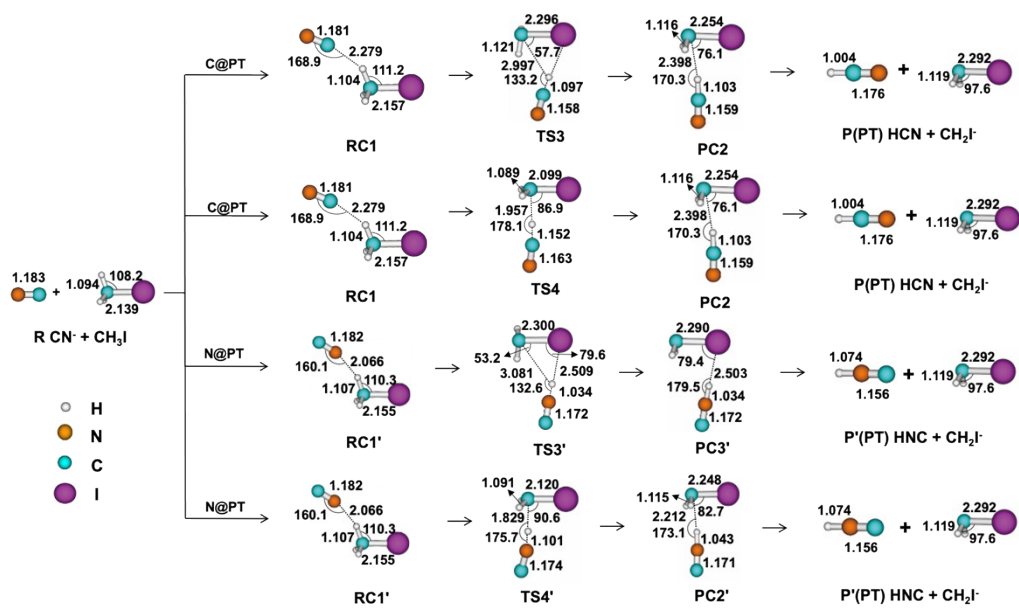

Figure S3. Stationary point structures of proton transfer channels in the  $\text{CN}^- + \text{CH}_3\text{I}$  reaction optimized at the M06/ECP/d level of theory. Bond distances (in Å) and angles (in degree).

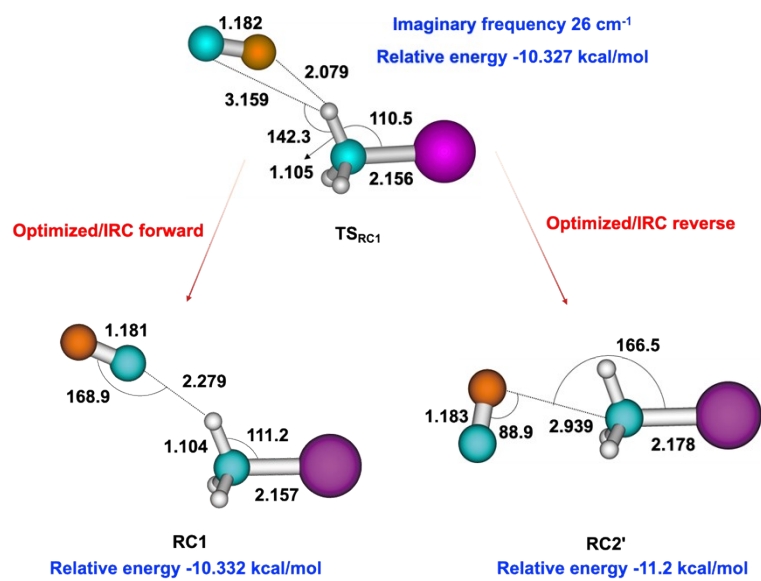

Figure S4. Geometries of transition state  $TS_{RC1}$  between  $RC1$  and  $RC2'$  for the  $CN^- + CH_3I$  reaction optimized at the M06/ECP/d level of theory. Bond distances are in Å and angles are in degrees.

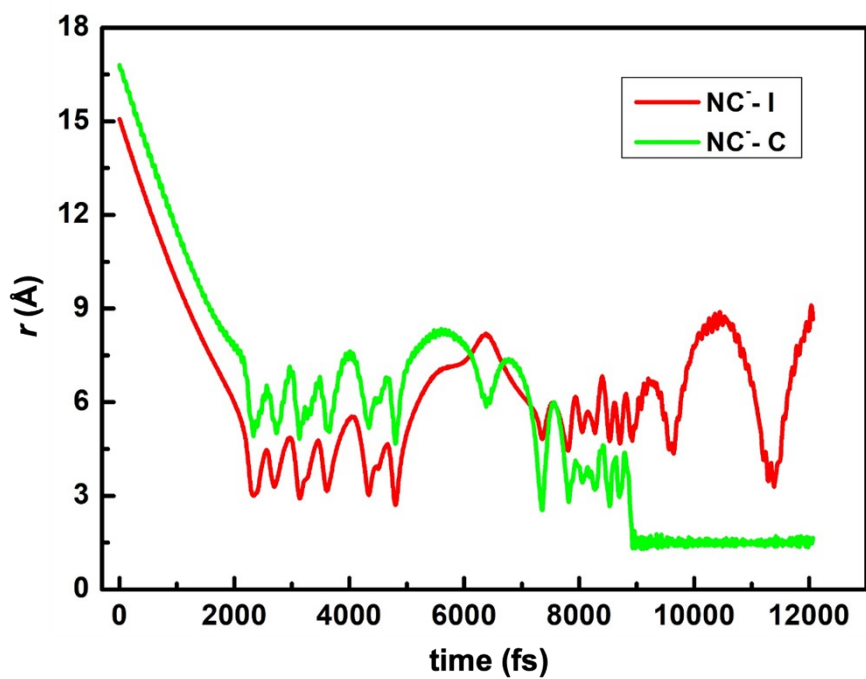

Figure S5. **Representative** plots of the distance (Å) between C of CN<sup>-</sup> and C/I of CH<sub>3</sub>I versus time (fs) with pre + halogen + post mechanism for CN<sup>-</sup> + CH<sub>3</sub>I → CH<sub>3</sub>CN + I<sup>-</sup> reaction.

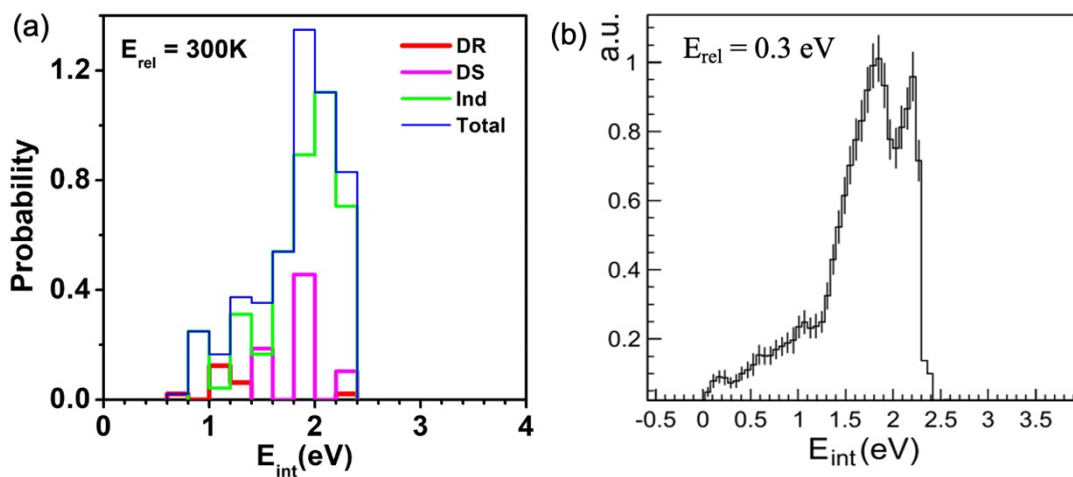

Figure S6. Product internal energy distributions from reactions of  $\text{CN}^- + \text{CH}_3\text{I}$   $\text{S}_{\text{N}}2$  reaction. (a) Products energy distributions at room temperature are illustrated for the direct rebound (red), direct stripping (light purple), and indirect (green) mechanisms and for the total scattering (dark blue). (b) The experimental energy distributions at low collision energy 0.3 eV in ref. E. Carrascosa, M. Bawart, M. Stei, F. Linden, F. Carelli, J. Meyer, W. D. Geppert, F. A. Gianturco and R. Wester, *J. Chem. Phys.*, 2015, **143**, 184309.



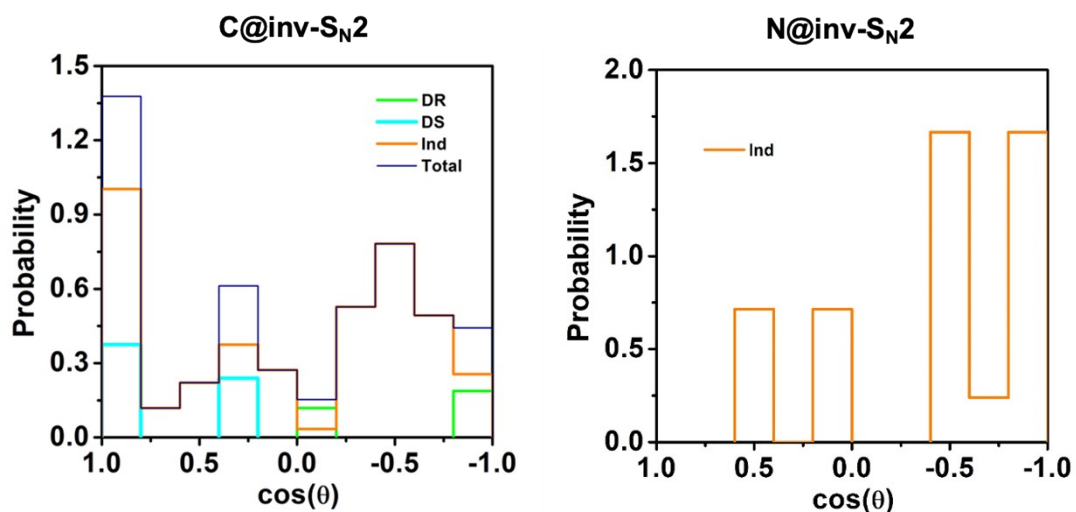

Figure S7. Velocity scattering angle distributions for the individual reaction mechanisms and for the C@inv-S<sub>N</sub>2 and N@inv-S<sub>N</sub>2 reaction channels. The green, light blue, orange, and dark blue lines represent the direct rebound, direct stripping, indirect reactions, and total reaction, respectively. The trajectory results are properly weighted by  $b$  and the reaction probability versus  $b$ .

## Animations S1 - S8

Animation S1. A trajectory following the direct rebound (DR) mechanism for the C@inv-S<sub>N</sub>2 reaction  $\text{CN}^- + \text{CH}_3\text{I} \rightarrow \text{CH}_3\text{CN} + \text{I}^-$ .

Animation S2. A trajectory following the direct stripping (DS) mechanism for the C@inv-S<sub>N</sub>2 reaction  $\text{CN}^- + \text{CH}_3\text{I} \rightarrow \text{CH}_3\text{CN} + \text{I}^-$ .

Animation S3. A typical indirect trajectory trapped in pre-reaction potential energy well and forming reaction intermediates RC1/RC1' and RC2/RC2' (see Figure 1) for the C@inv-S<sub>N</sub>2 reaction.

Animation S4. A typical indirect trajectory trapped in pre-reaction potential energy well and forming reaction intermediates XRC/XRC', RC1/RC1' and RC2/RC2' (see Figure 1) for the C@inv-S<sub>N</sub>2 reaction.

Animation S5. A typical indirect trajectory trapped in both pre-reaction and post-reaction potential energy wells and forming reaction intermediates RC1/RC1', RC2/RC2' and PC (see Figure 1) for the C@inv-S<sub>N</sub>2 reaction.

Animation S6. A typical indirect trajectory trapped in both pre-reaction and post-reaction potential energy wells and forming reaction intermediates XRC/XRC', RC1/RC1', RC2/RC2' and PC (see Figure 1) for the C@inv-S<sub>N</sub>2 reaction.

Animation S7. A typical indirect trajectory trapped in pre-reaction potential energy well and forming reaction intermediates RC1/RC1' and RC2/RC2' (see Figure 1) for the N@inv-S<sub>N</sub>2 reaction  $\text{CN}^- + \text{CH}_3\text{I} \rightarrow \text{CH}_3\text{NC} + \text{I}^-$ .

Animation S8. A typical indirect trajectory trapped in both pre-reaction and post-reaction potential energy wells and forming reaction intermediates RC1/RC1'

RC2/RC2' and PC' (see Figure 1) for the N@inv-S<sub>N</sub>2 reaction  $\text{CN}^- + \text{CH}_3\text{I} \rightarrow \text{CH}_3\text{NC} + \text{I}^-$ .
